# Supplementary material for: Interference of silver nanoparticles with essential metal homeostasis in a novel enterohepatic fishin vitrosystem
Source: Royal Society of Chemistry journal article supplement (doi:10.1039/c9en00310j), 2019-01-01
Supplement: c9en00310j1.pdf [file c9en00310j1.pdf]

Supplementary Information

**SILVER NANOPARTICLES INTERFERE WITH ESSENTIAL METAL HOMEOSTASIS IN  
A MULTI-CELLULAR FISH *IN VITRO* SYSTEM**

Matteo Minghetti<sup>1,4#</sup> and Kristin Schirmer<sup>1,2,3\*</sup>

<sup>1</sup> Eawag, Swiss Federal Institute of Aquatic Science and Technology, Switzerland

<sup>2</sup> EPF Lausanne, School of Architecture, Civil and Environmental Engineering, Switzerland

<sup>3</sup> ETH Zürich, Institute of Biogeochemistry and Pollutant Dynamics, Switzerland

<sup>4</sup> Oklahoma State University, Department of Integrative Biology, USA

# Corresponding author

Current address: Department of Integrative Biology, 501 Life Sciences West, Oklahoma State  
University, Stillwater, OK 74078.

Email: [matteo.minghetti@okstate.edu](mailto:matteo.minghetti@okstate.edu)

\*Address: Eawag, Swiss Federal Institute of Aquatic Science and Technology, Überlandstrasse 133,  
P.O. Box 611, 8600 Dübendorf, Switzerland

Email: [kristin.schirmer@eawag.ch](mailto:kristin.schirmer@eawag.ch)

Content:

Table S1. EC50 values calculated in RTgutGC.....

Table S2. Primers used for qPCR.....

Figure S1. Cit-AgNP characterization by TEM/EDX.....

Figure S2 Electron micrographs of RTgutGC .....

Figure S3. STEM/EDX analysis of RTgutGC.....

Figure S4. Quantitative PCR – absolute copy numbers.....

Figure S5. ATP7A trafficking – images separate channels.....

Table S1: EC50 values (in  $\mu\text{M}$ ) calculated for RTgutGC cells exposed to cit-AgNP or  $\text{AgNO}_3$

|                 |                 | <b>Metabolic activity</b>    | <b>Lysosome membrane integrity</b> |
|-----------------|-----------------|------------------------------|------------------------------------|
| <b>L-15/FBS</b> | $\text{AgNO}_3$ | -                            | -                                  |
|                 | cit-AgNP        | -                            | 925.4 $\pm$ 666.5                  |
| <b>L-15/ex</b>  | $\text{AgNO}_3$ | 5.2 $\pm$ 1.1 <sup>a</sup>   | 12.7 $\pm$ 5.1 <sup>a</sup>        |
|                 | cit-AgNP        | 122.6 $\pm$ 3.7 <sup>a</sup> | 53.4 $\pm$ 4.6 <sup>b</sup>        |

Values are mean and standard deviation from three independent experiments (n=3). EC50 values bearing different lettering are statistically different (t-test,  $p < 0.05$ ).

Table S2. Primers used for qPCR

| <b>Gene name</b> | <b>Forward primer 5'→3'</b> | <b>Reverse primer 5'→3'</b> | <b>Repository ID*</b> |
|------------------|-----------------------------|-----------------------------|-----------------------|
| <b>MTb</b>       | GCTCTAAACTGGCTCTTGC         | GTCTAGGCTCAAGATGGTAC        | M18104 <sup>a</sup>   |
| <b>ATP7A</b>     | ACTGCCGCTCCTGGTGTGGTAAAC    | ACGGTGGCGGTGTGGTGGATGTAG    | XM_021561788          |
| <b>ZnT1</b>      | TGGATCCGGGCTGAGGTGATGG      | CAAGCACAGCCCCGAGGAGGTTG     | NM_001124528          |
| <b>DMT1</b>      | AACAGTGTGGCGCTCTACGTGC      | TTGCCAGACAGGACACGTCCA       | NM_001172513          |
| <b>GR</b>        | TACACCGCGCCTCATATCCTCATT    | TGCCAGCCATTTCCACAGC         | HF969248              |
| <b>ATP1a1</b>    | TGTGGCCGTCTTTCTGGGCATG      | AGCAAATGGTGGAGGTGGAGCC      | NM_001124459          |
| <b>EF1a</b>      | ATATCCGTCGTGGCAACGTGGC      | TGAGCTCGCTGAACTTGCAGGC      | NM_001124339          |
| <b>Ubiquitin</b> | GCTGCGTCTTCGTGGAGGCATT      | TTGGGGCGCAGGTTGTTTGTGT      | NM_001124194          |

\*GenBank (<http://www.ncbi.nlm.nih.gov/>).

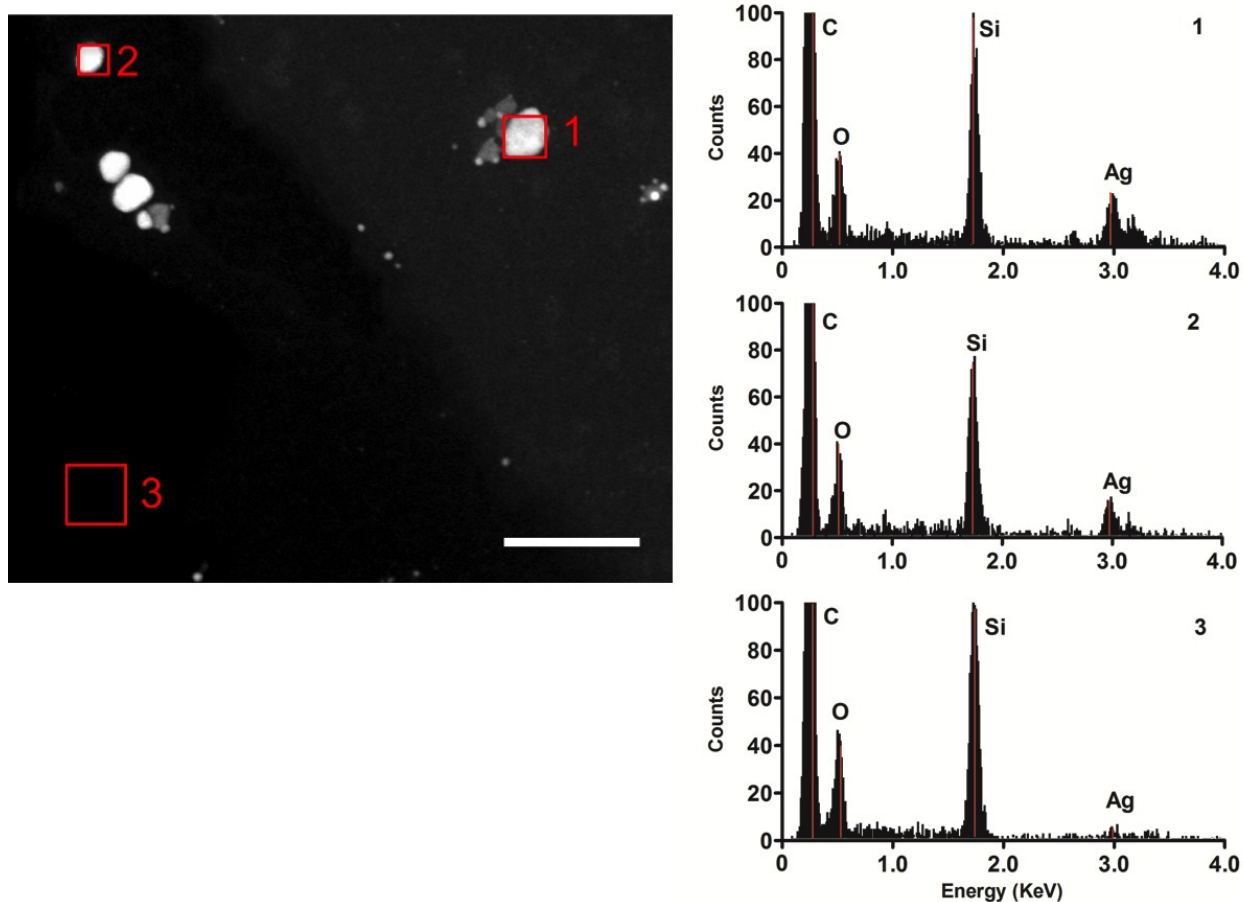

Figure S1: (A) STEM image of cit-AgNP showing a broad size distribution ranging from 20 to 30 nm. (B) EDX of area 1 and 2 shows the elemental silver composition, 3 shows the background. Scale bar = 100 nm

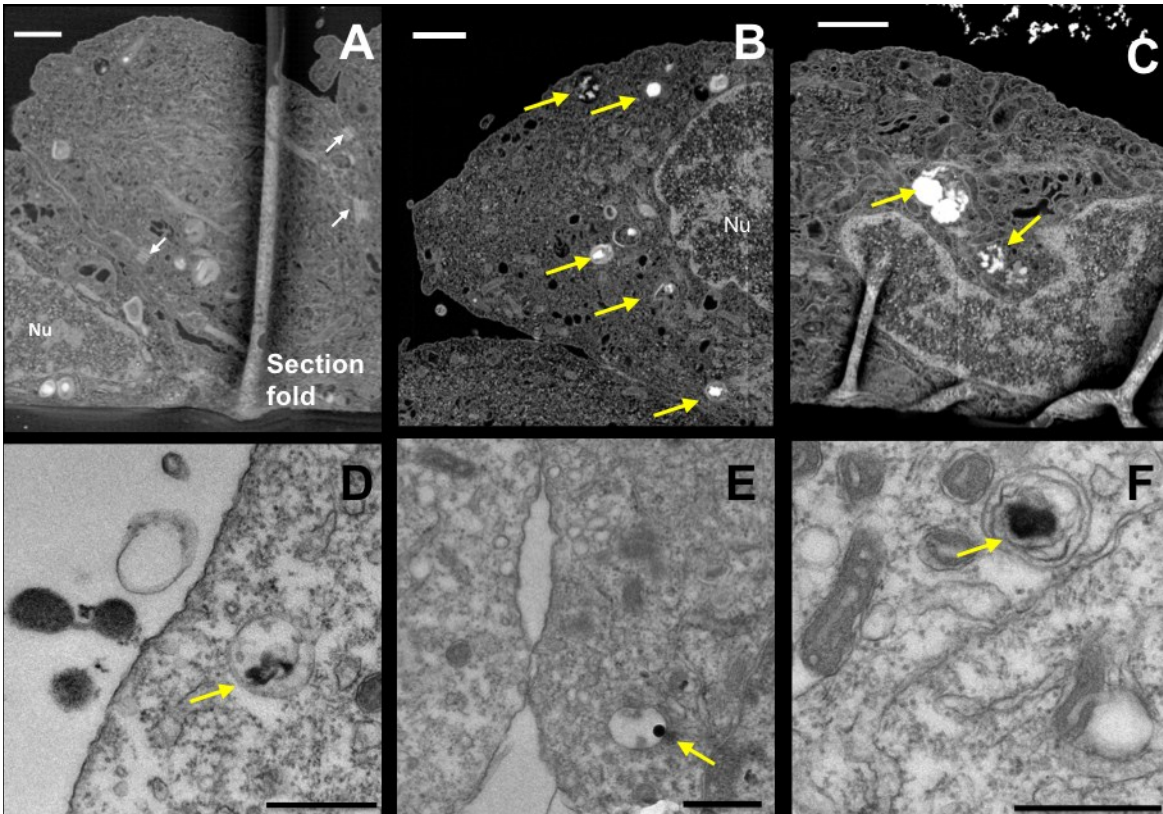

Figure S2: RTgutGC grown for 21 days on transwell inserts. Image A, B and C obtained by Scanning Electron Microscopy, shows a section of RTgutGC monolayer. Image D, E, F obtained by Transmission Electron Microscopy. A, shows control unexposed cells and white arrows indicates desmosomes, B, D, E, F cells exposed to 50  $\mu\text{M}$  cit-AgNP for 3 hrs in L-15/ex and C cells exposed to 10  $\mu\text{M}$  for 24 hrs in L-15/ex. Yellow arrows indicate electron dense material in a lysosome or autophagosome morphology. In A, B, C bar = 1  $\mu\text{m}$  in D, E, F bar = 0.5  $\mu\text{m}$ .

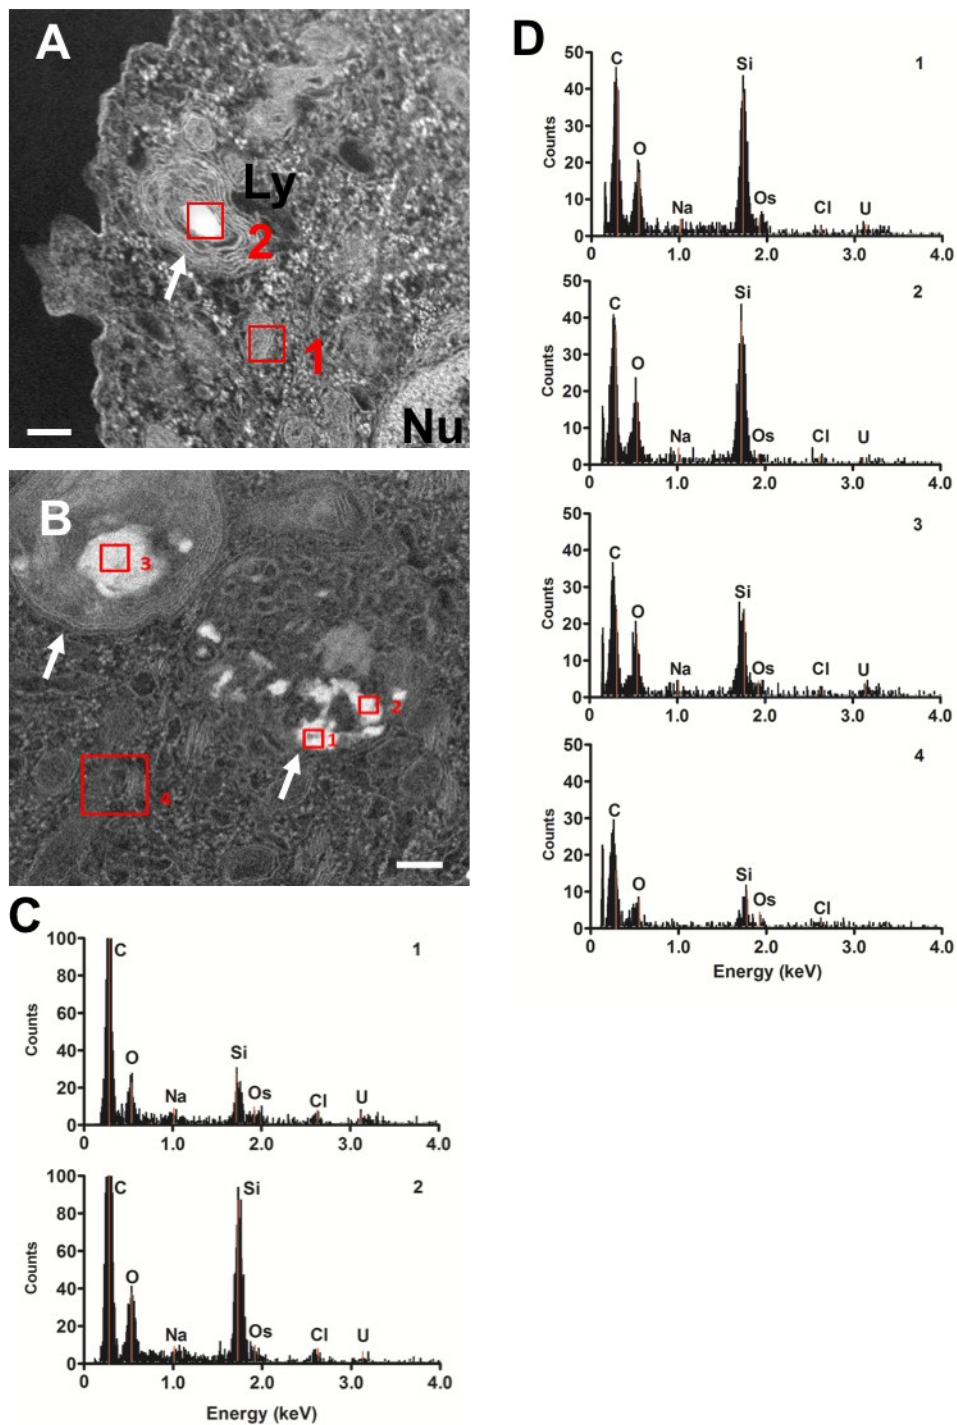

Figure S3: A and B shows STEM images of RTgutGC cells exposed for 24 hrs to 10  $\mu\text{M}$  cit-AgNP in L-15/FBS and L-15/ex respectively. The corresponding EDX spectra are shown in panel C and D. Elemental Ag was not detectable. White arrows indicate possible lysosomes or autophagosomes. Scale bar is 200 nm in both images.

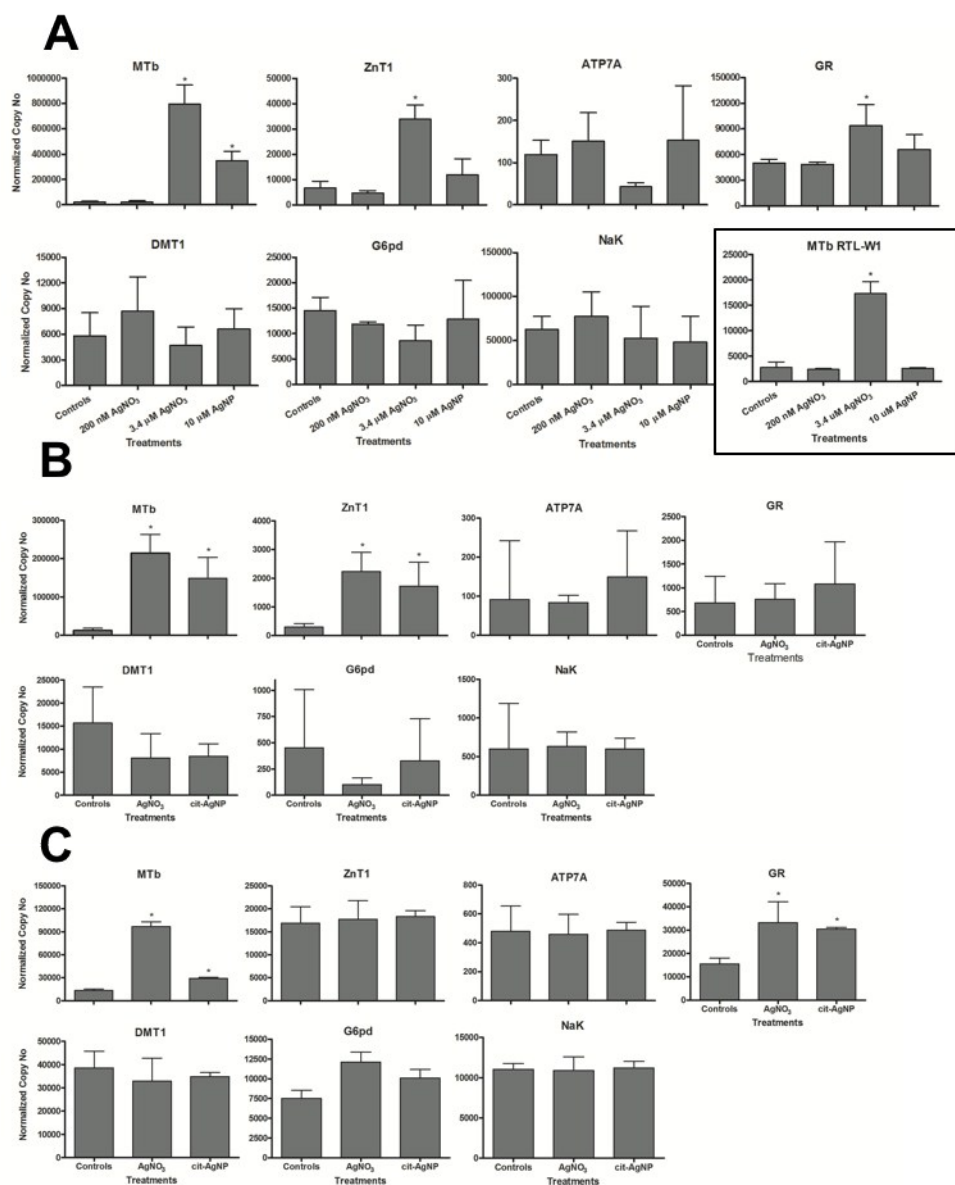

Figure S4: Normalized mRNA expression measured in RTgutGC (and RTL-W1 panel A only) cells. (A) toxic doses (~25% reduction in viability) of AgNO<sub>3</sub> and cit-AgNP and Ag concretion that were estimated to dissolve from cit-AgNP (200 nM = 2% of 10 μM) in L-15/ex (Yue et al., 2014); (B) non-toxic doses of AgNO<sub>3</sub> and cit-AgNP in L-15/ex; (C) not toxic doses of AgNO<sub>3</sub> and cit-AgNP in L-15/FBS. Values are means ± Sd (n=3). Statistical difference from controls for is indicated by an asterisk (\*) (ANOVA, Dunnett test p < 0.05). Note that scales are different due to the wide variation in gene expression levels.

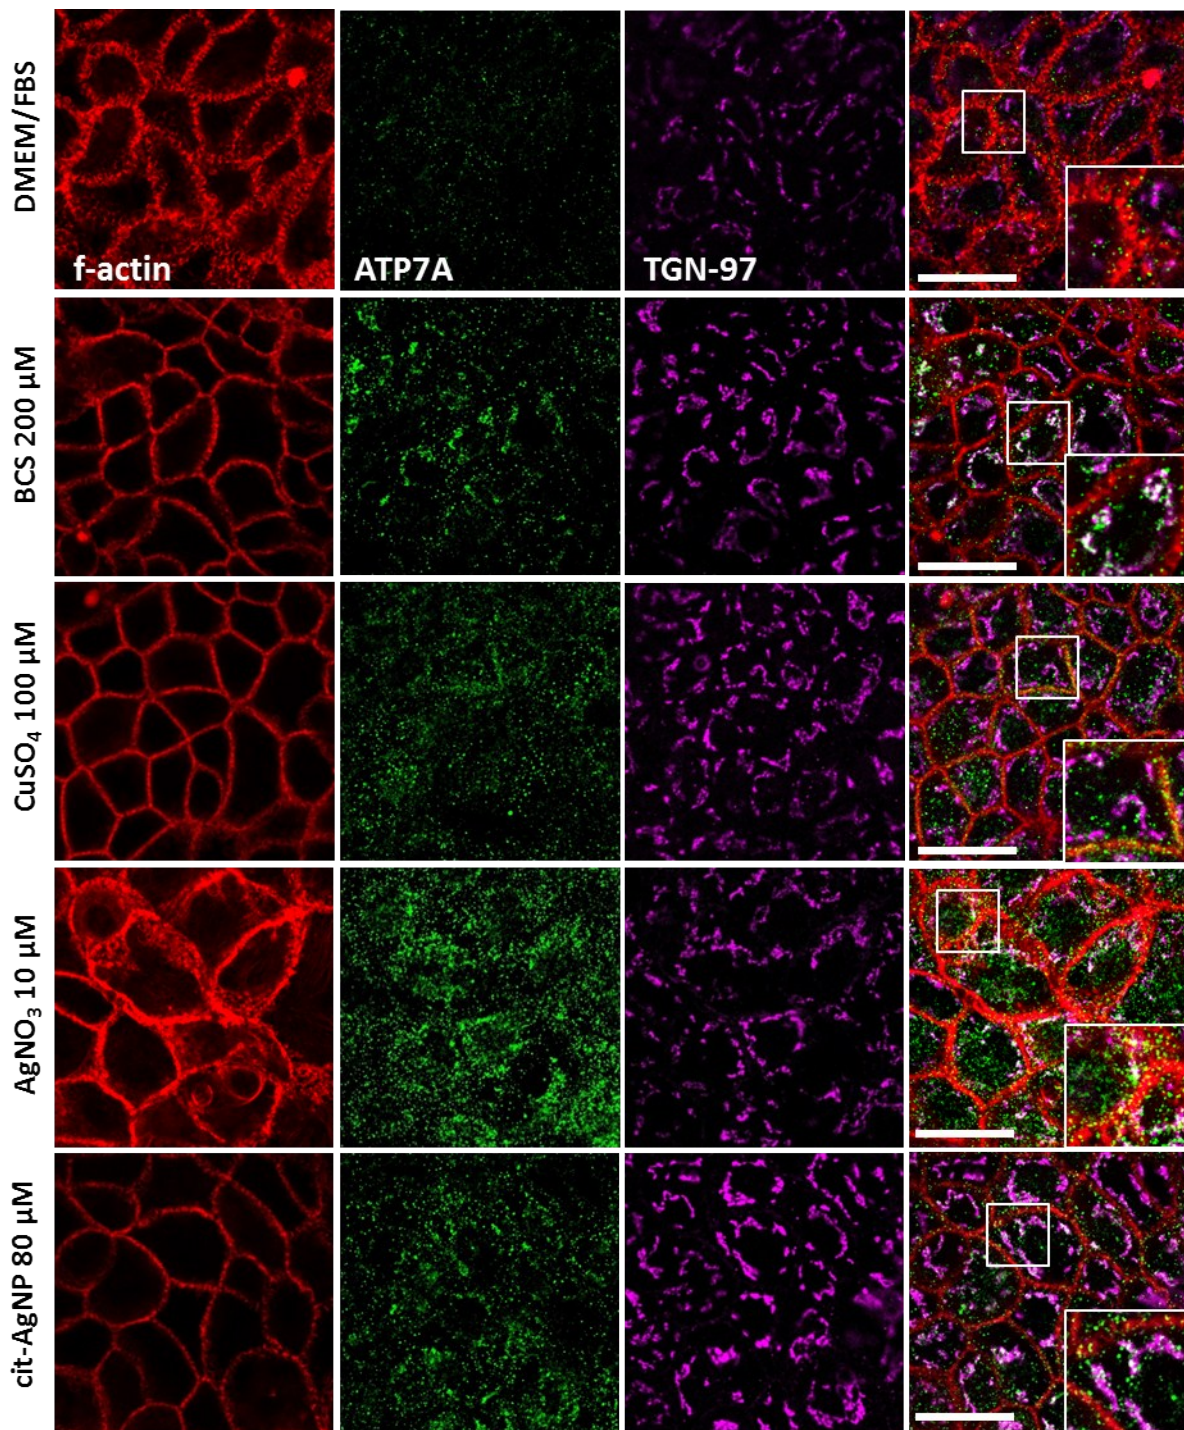

Figure S5. ATP7A protein trafficking. Caco2 cells were grown in the presence of 200  $\mu\text{M}$  BCS for 18 hrs followed by the indicated treatment for 3 hrs and processed for immunostaining. Co-localization of ATP7A (in green) with cellular markers of cell periphery (in red, f-actin) and trans golgi network (TGN, in purple, Golgin97) is shown in insert panels. Insets are enlarged X2. Scale bars = 25  $\mu\text{m}$ . Images were acquired using a laser scanning confocal microscope Leica SP5 and software 9LAS AF 2v. Insets are enlarged X2. Scale bars = 25  $\mu\text{m}$ .
